# Supplementary material for: l-Arginine Improves Solubility and ANTI SARS-CoV-2 Mpro Activity of Rutin but Not the Antiviral Activity in Cells
Source: MDPI journal article supplement (doi:10.3390/molecules26196062), 2021-10-07

# L-Arginine improves solubility and anti SARS-CoV-2 Mpro activity of Rutin but not the antiviral activity in Cells.

Luca Sancineto<sup>1</sup>, Carmine Ostacolo<sup>2</sup>, David Ortega-Alarcon,<sup>3,4</sup> Ana Jimenez-Alesanco,<sup>3,4</sup> Laura Ceballos-Laita,<sup>3,5</sup> Sonia Vega,<sup>3</sup> Olga Abian,<sup>3,4,5,6,7</sup> Adrian Velazquez-Campoy,<sup>3,4,6,7,8</sup> Silvia Moretti<sup>9</sup>, Agnieszka Dabrowska<sup>10,11</sup>, Pawel Botwina<sup>10,11</sup>, Aleksandra Synowiec<sup>10</sup>, Anna Kula-Pacurar<sup>10</sup>, Krzysztof Pyrc<sup>10</sup>, Nunzio Iraci<sup>12,\*</sup> and Claudio Santi<sup>1,\*</sup>

- <sup>1</sup> Group of Catalysis Synthesis and Organic Green Chemistry, Department of Pharmaceutical Sciences, University of Perugia, Via del Liceo 1, 06122, Perugia (PG), Italy; [luca.sancineto@unipg.it](mailto:luca.sancineto@unipg.it)
- <sup>2</sup> Department of Pharmacy, University of Naples Federico II, 80131 Napoli, Italy; [carmine.ostacolo@unina.it](mailto:carmine.ostacolo@unina.it)
- <sup>3</sup> Institute for Biocomputation and Physics of Complex Systems (BIFI), Joint Units IQFR-CSIC-BIFI, and GBsC-CSIC-BIFI, Universidad de Zaragoza, 50018 Zaragoza, Spain; [dortega@bifi.es](mailto:dortega@bifi.es), [ajimenez@bifi.es](mailto:ajimenez@bifi.es), [ceballos.laita@gmail.com](mailto:ceballos.laita@gmail.com), [svega@bifi.es](mailto:svega@bifi.es), [oabifra@unizar.es](mailto:oabifra@unizar.es); [adrianvc@unizar.es](mailto:adrianvc@unizar.es)
- <sup>4</sup> Departamento de Bioquímica y Biología Molecular y Celular, Universidad de Zaragoza, 50009 Zaragoza, Spain
- <sup>5</sup> Instituto de Investigación Sanitaria de Aragón (IIS Aragon), 50009 Zaragoza, Spain
- <sup>6</sup> Instituto Aragonés de Ciencias de la Salud (IACS), 50009 Zaragoza, Spain.
- <sup>7</sup> Centro de Investigación Biomédica en Red en el Área Temática de Enfermedades Hepáticas Digestivas (CIBERehd), 28029 Madrid, Spain
- <sup>8</sup> Fundación ARAID, Gobierno de Aragón, 50018 Zaragoza, Spain
- <sup>9</sup> Eco Tech, Ponte San Giovanni, Perugia, Italy; [silvia.moretti@ecotechgroup.it](mailto:silvia.moretti@ecotechgroup.it)
- <sup>10</sup> Virogenetics Laboratory of Virology, Malopolska Centre of Biotechnology, Jagiellonian University, Gronostajowa 7a, 30-387 Krakow, Poland.
- <sup>11</sup> Microbiology Department, Faculty of Biochemistry, Biophysics and Biotechnology, Jagiellonian University, Gronostajowa 7, 30-387 Krakow, Poland.
- <sup>12</sup> Department of Chemical, Biological, Pharmaceutical, and Environmental Sciences. University of Messina. Viale Ferdinando Stagno d'Alcontres, 31, 98166 Messina, Italy;

Figure S1. Citotoxic and antiviral evaluation

<sup>1</sup>H NMR of RutinArg

<sup>13</sup>C NMR of RutinArg

S2

S3

S4

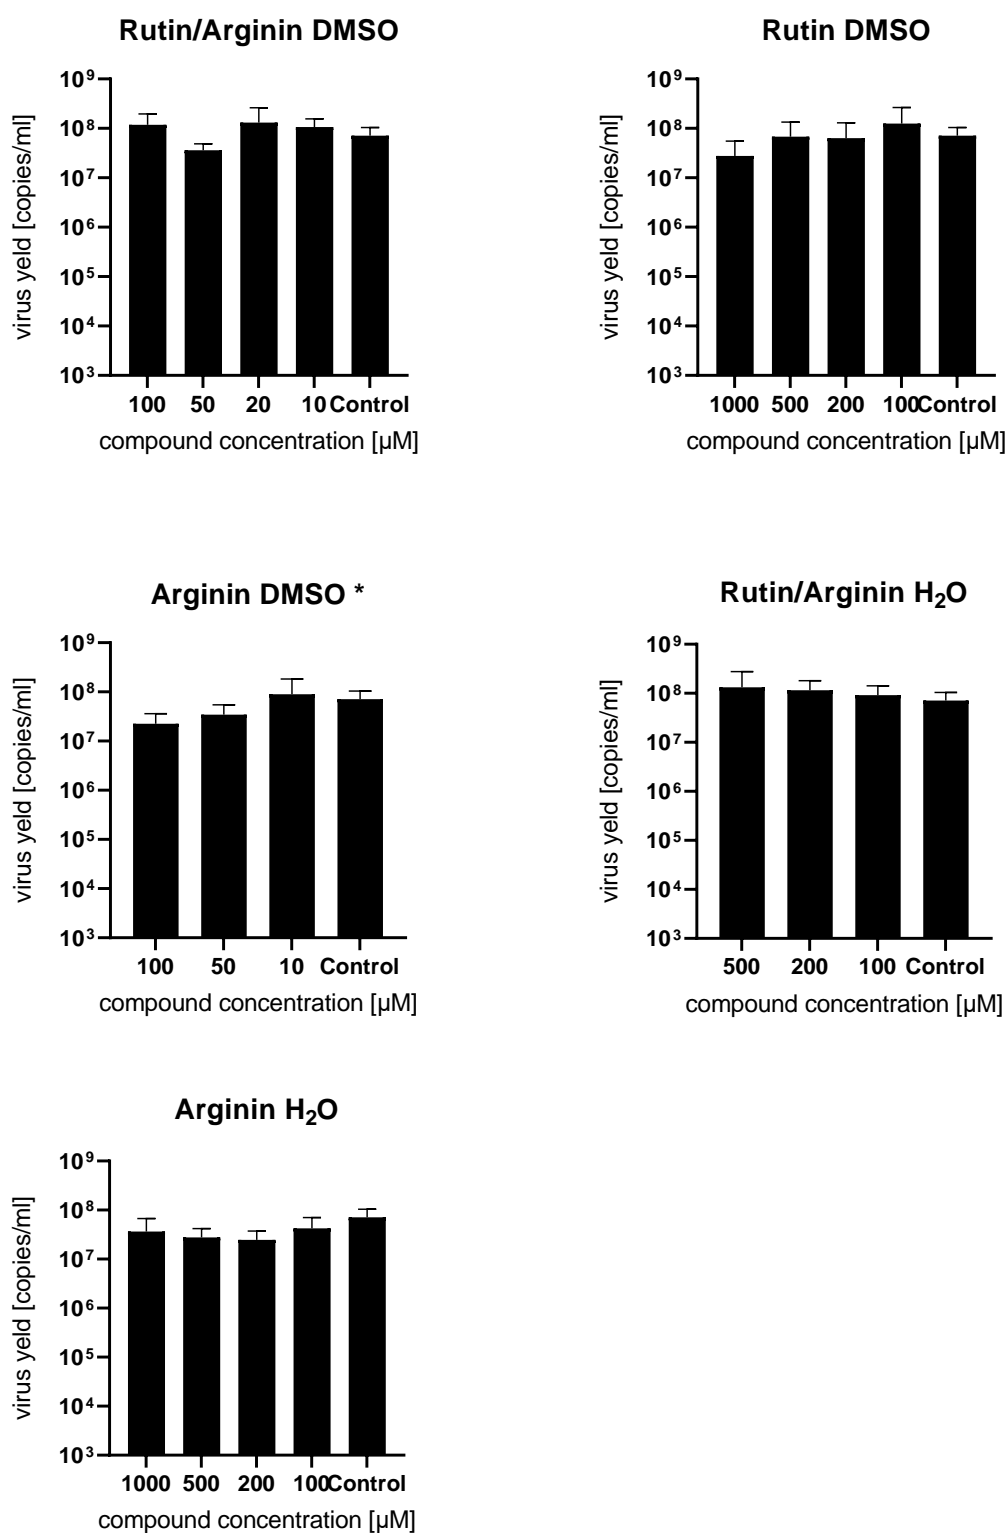

**Figure S1.** Antiviral activity of rutin and its combination with arginine against SARS-CoV-2. Virus replication was evaluated using RT-qPCR. The data are presented as SARS-CoV-2 RNA copies per ml of the original sample. Bars show mean with SD. \* - partial resuspension in DMSO as some precipitates were visible.

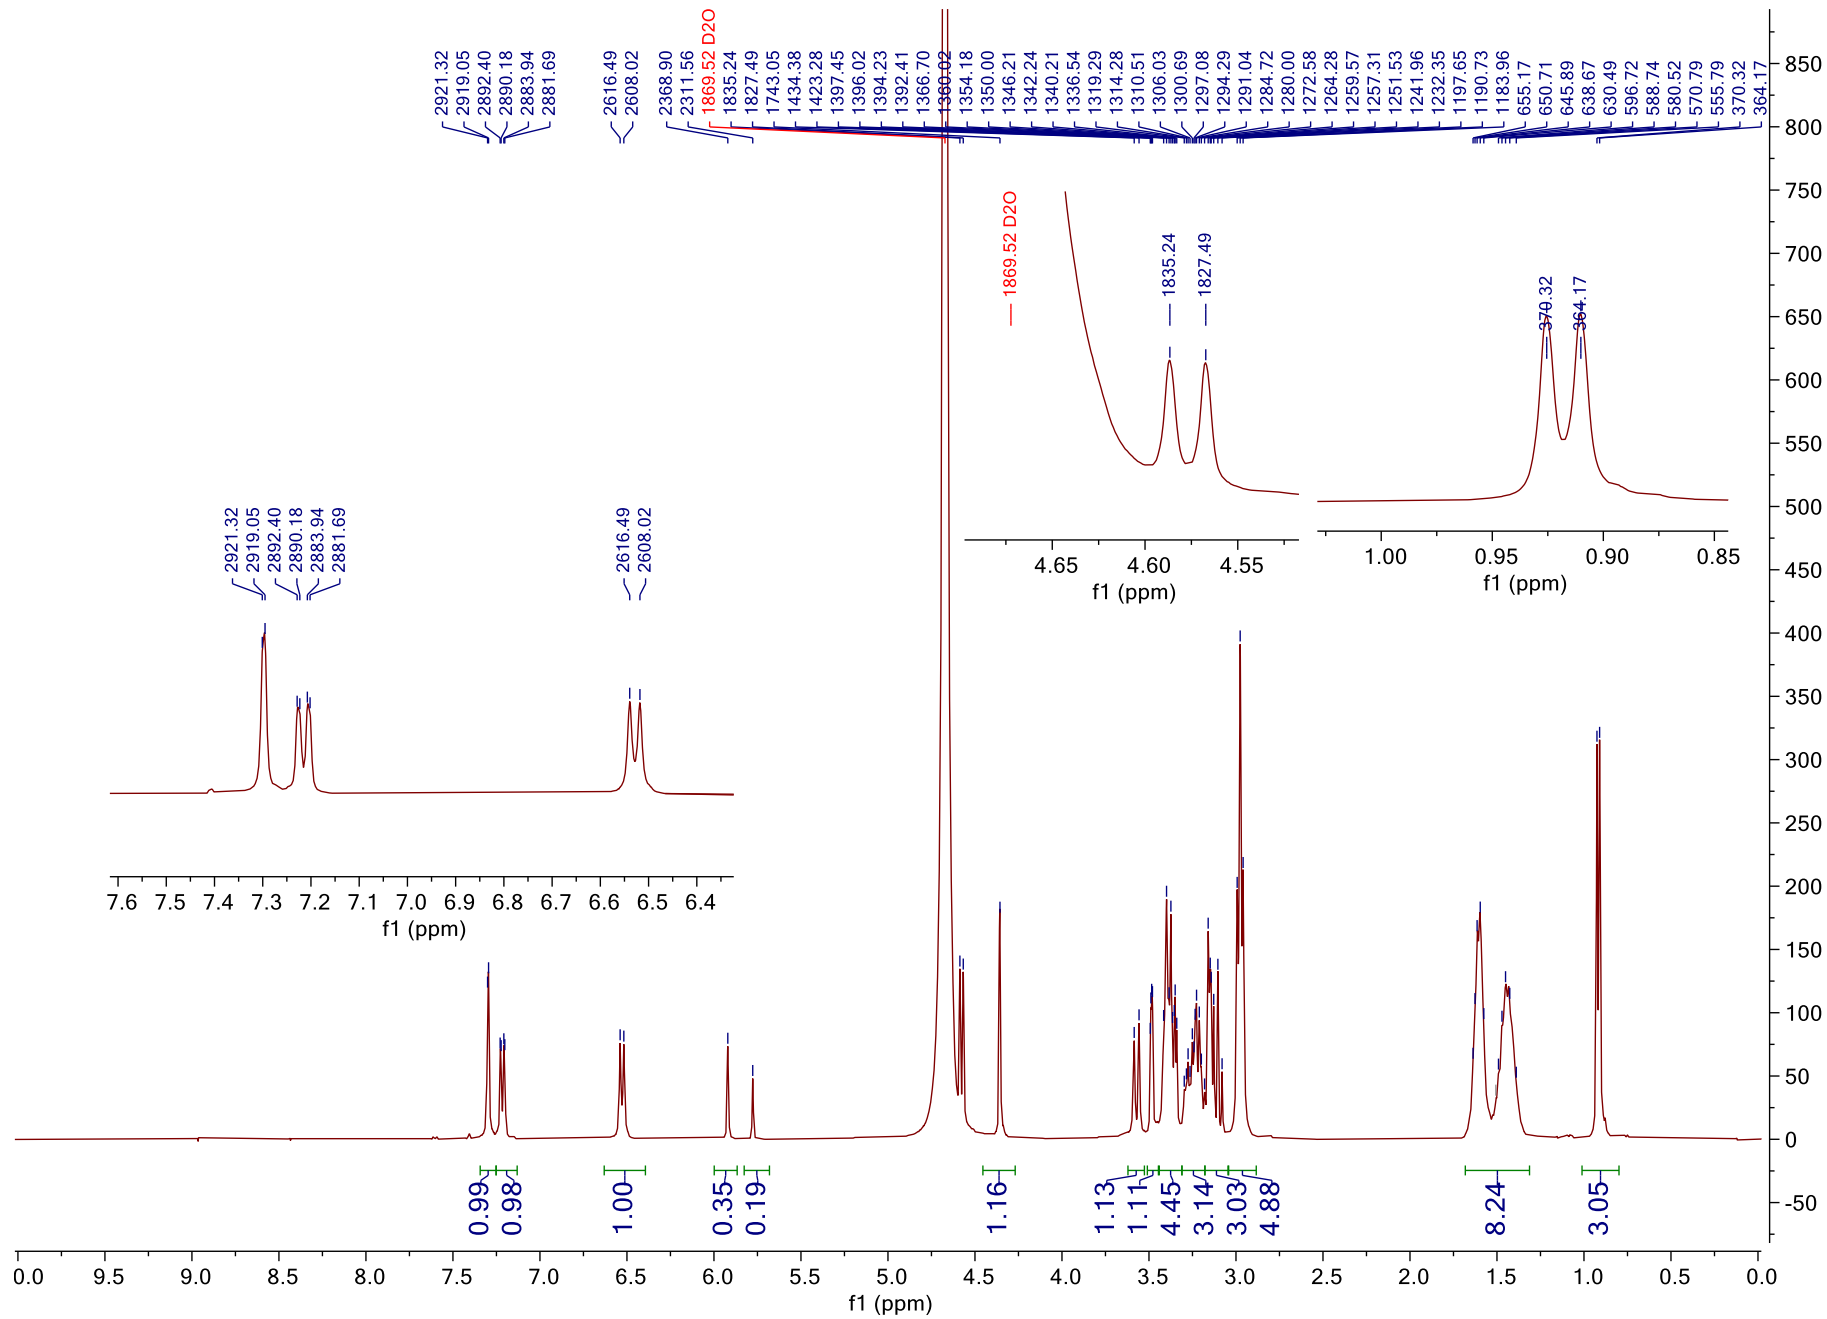

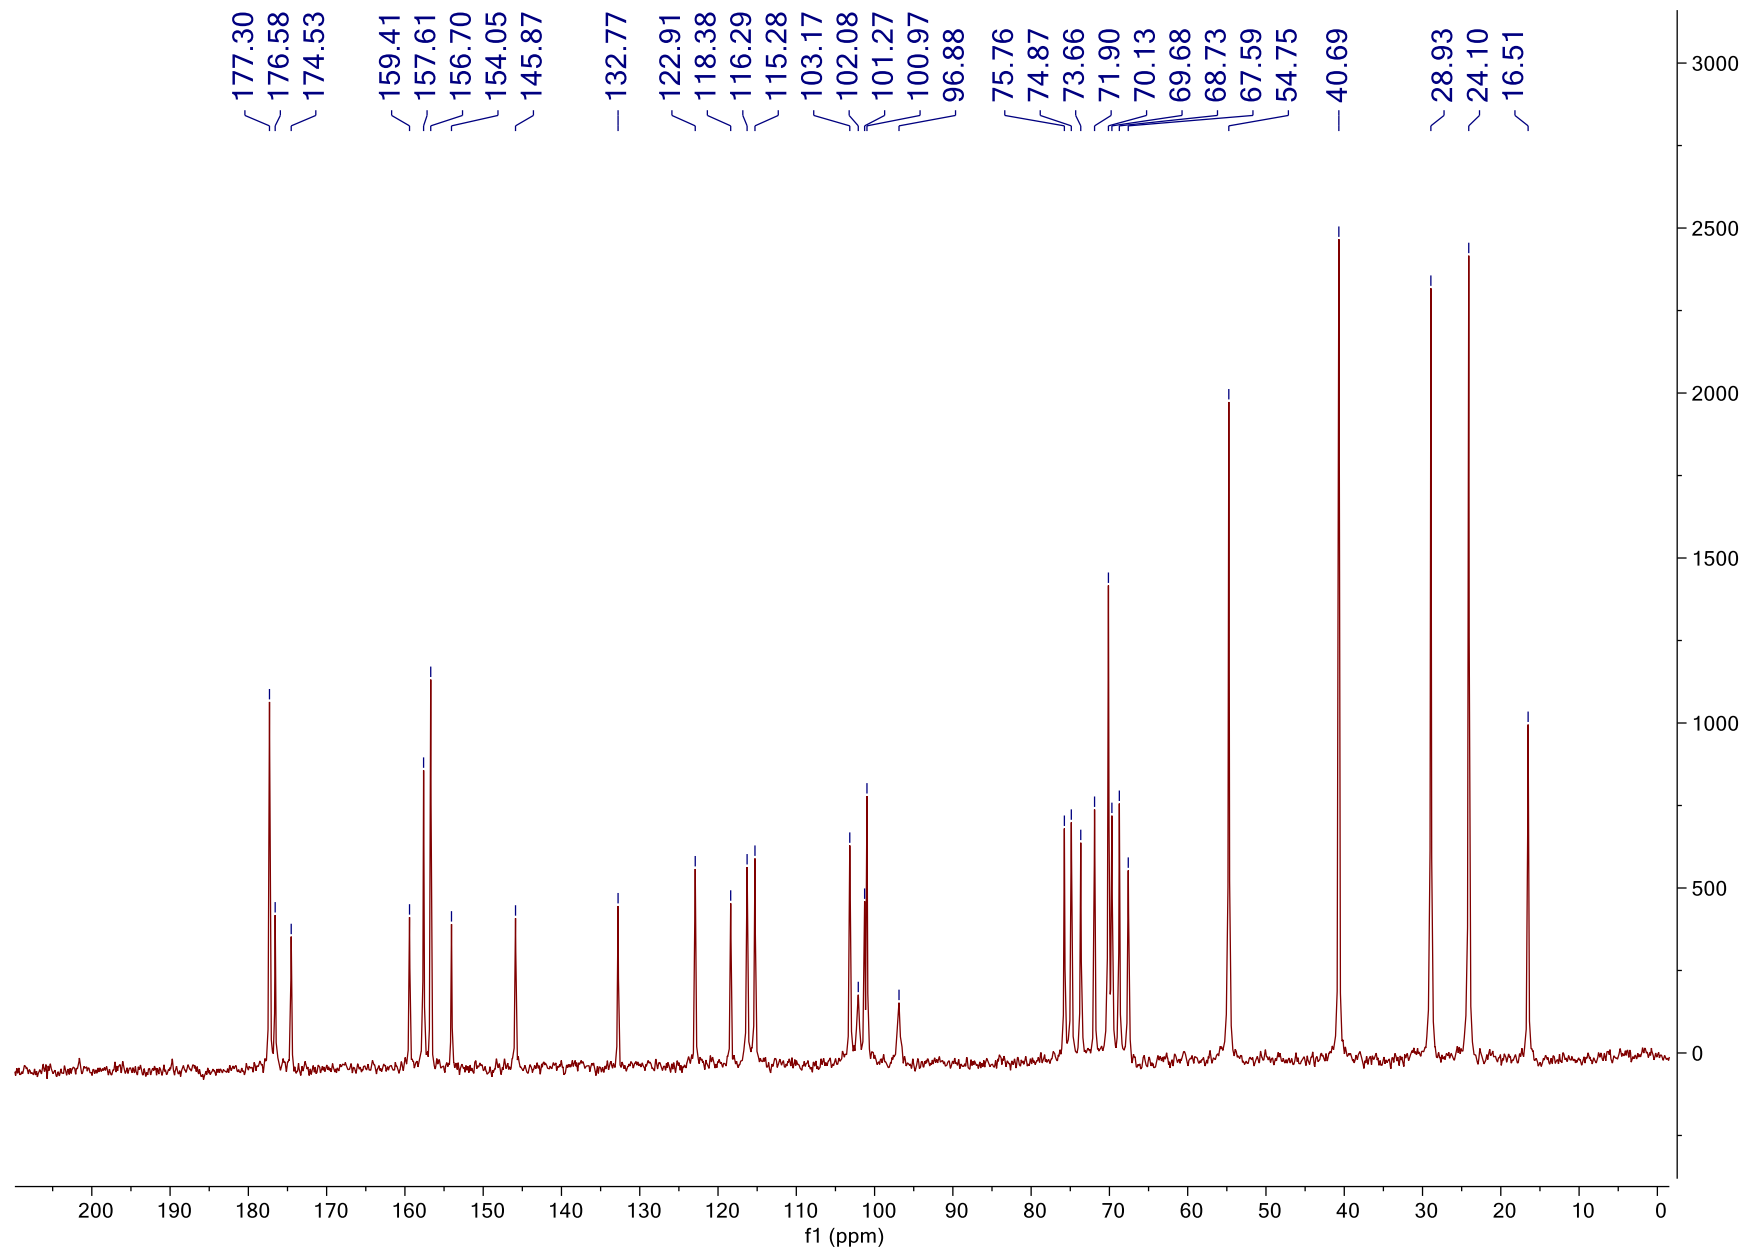

Supplement: s1 [file s1]
